# Supplementary material for: New insight on facet-dependent physicochemical properties of anatase TiO2 nanostructures for efficient photocatalysis
Source: Royal Society of Chemistry journal article supplement (doi:10.1039/c6ra13129h), 2016-01-01
Supplement: c6ra13129h1.pdf [file c6ra13129h1.pdf]

## New Sight on Facet-Dependent Physicochemical properties of Anatase TiO<sub>2</sub> Nanostructures for Efficient Photocatalysis

Wei Wang<sup>\*a,b</sup>, Jiaojiao Fang<sup>b,c</sup>, Yingjie Zhou<sup>a</sup>, Wenyan Zhang<sup>b,d</sup>, Chunhua Lu<sup>b,c\*</sup>

<sup>a</sup>School of Physics and Optoelectronic Engineering, Nanjing University of  
Information Science & Technology, Nanjing 210044, PR China

<sup>b</sup>Jiangsu Collaborative Innovation Center for Advanced Inorganic Function  
Composites, Nanjing Tech University, Nanjing 210009, PR China

<sup>c</sup>State Key Laboratory of Materials-Oriented Chemical Engineering, College of  
Materials Science and Engineering, Nanjing Tech University, Nanjing 210009, PR  
China

<sup>d</sup>College of Material Engineering, Jinling Institute of Technology, Nanjing 211169,  
PR China

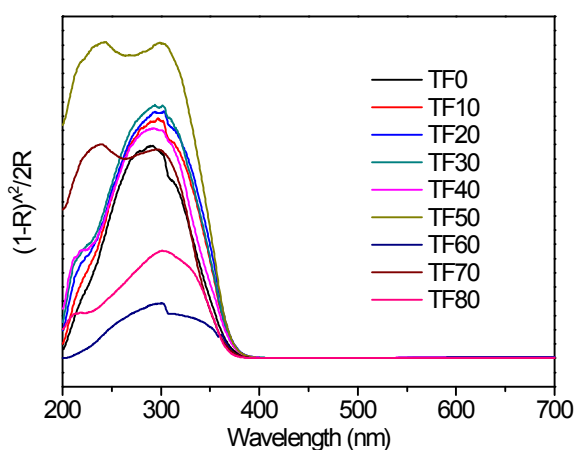

Fig. S1 UV-vis absorption spectra of the as-prepared TiO<sub>2</sub> photocatalysts.

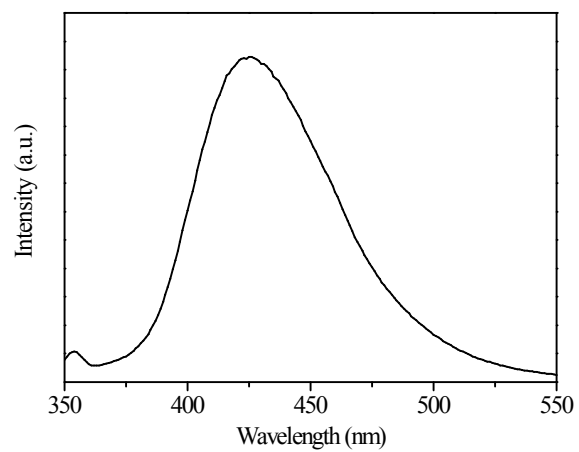

Fig. S2 Fluorescence emission spectrum of 2-hydroxyterephthalic acid under the 315 nm excitation.
